# Supplementary material for: Inertial Microfluidics-Based Separation of Microalgae Using a Contraction–Expansion Array Microchannel
Source: PubMed Central journal article supplement (PMC7833403; doi:10.3390/mi12010097), 2021-01-19
Supplement: micromachines-12-00097-s001.pdf [file micromachines-12-00097-s001.pdf]

# Inertial Microfluidics-Based Separation of Microalgae Using a Contraction–Expansion Array Microchannel

Ga-Yeong Kim <sup>1</sup>, Jaejung Son <sup>2</sup>, Jong-In Han <sup>1,\*</sup> and Je-Kyun Park <sup>2,\*</sup>

<sup>1</sup> Department of Civil and Environmental Engineering, Korea Advanced Institute of Science and Technology (KAIST), 291 Daehak-ro, Yuseong-gu, Daejeon 34141, Republic of Korea; kgy003@kaist.ac.kr (G.-Y.K.)

<sup>2</sup> Department of Bio and Brain Engineering, Korea Advanced Institute of Science and Technology (KAIST), 291 Daehak-ro, Yuseong-gu, Daejeon 34141, Republic of Korea; sonjj7@kaist.ac.kr (J.S.)

\* Correspondence: jihan@kaist.ac.kr (J.-I.H.); Tel:+82-42-350-3629; jekyun@kaist.ac.kr (J.-K. P.); Tel.: +82-42-350-4315

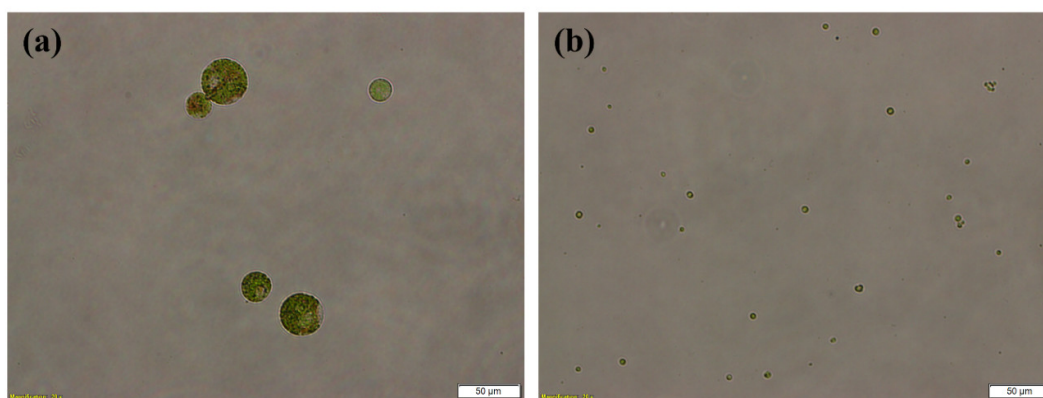

**Figure S1.** A microscopic image of algal cells obtained from each of (a) outlet 2 and (b) outlet 6 after 7 days of cultivation. Scale bar = 50  $\mu\text{m}$ .
